# Supplementary material for: Molecular Design Using Selected Concentration Effects in Optically Activated Fluorescent Matrices
Source: MDPI journal article supplement (doi:10.3390/ijms25094804), 2024-04-28
Supplement: s1 [file s1]

SUPPLEMENTARY INFORMATION:

# "Molecular design using selected concentration effects in optically activated fluorescent matrices".

Aneta Lewkowicz<sup>1\*</sup>, Katarzyna Walczewska-Szewc<sup>2\*</sup>, Martyna Czarnomska<sup>1</sup>, Emilia Gruszczyńska<sup>1</sup>, Mattia Pierpaoli<sup>3</sup>, Robert Bogdanowicz<sup>3</sup>, Zygmunt Gryczyński<sup>4</sup>

1. Faculty of Mathematics, Physics, and Informatics of the University of Gdansk, Institute of Experimental Physics, ul. Wita Stwosza 57, 80-308 Gdańsk, Poland; \*email: aneta.lewkowicz@ug.edu.pl,
2. Institute of Physics, Faculty of Physics, Astronomy and Informatics, Nicolaus Copernicus University in Toruń, ul. Grudziądzka 5, 87-100 Toruń, Poland; \*email: kszewc@umk.pl
3. Department of Metrology and Optoelectronics, Faculty of Electronics, Telecommunication, and Informatics, Gdańsk University of Technology, Gabriela Narutowicza 11/12, Gdańsk 80-233, Poland
4. Department of Physics and Astronomy, Texas Christian University, 2800 S. University Dr. Fort Worth, Texas, 76129, USA.

**Table S1.** The mean fluorescence lifetime (amplitude weighted,  $\tau_{\text{medium}} = \left( \frac{t_1 A_1 + t_2 A_2}{t_1 + t_2} \right)$ ) of DFO in PVA films.  $\lambda_{\text{obs}} = 580 \text{ nm}$ ;  $\lambda_{\text{ex}} = 380 \text{ nm}$ , 455 nm, and 560 nm.

| c [M]  | $\tau_{\text{medium}}$ [ns]<br>380 [nm] | $\chi^2$ | $\tau_{\text{medium}}$ [ns]<br>455 [nm] | $\chi^2$ | $\tau_{\text{medium}}$ [ns]<br>560 [nm] | $\chi^2$ |
|--------|-----------------------------------------|----------|-----------------------------------------|----------|-----------------------------------------|----------|
| 0.0001 | 4.082                                   | 1.04     | 4.352                                   | 0.973    | 5.115                                   | 0.912    |
| 0.001  | 5.157                                   | 1.12     | 3.398                                   | 0.962    | 3.349                                   | 0.955    |
| 0.005  | 2.252                                   | 1.03     | 2.540                                   | 0.918    | 2.312                                   | 0.930    |

**Table S2.** Detailed IR spectra information of DFO and DAK DFO in ethanol solution (implicit solvent model).

| DFO in ethanol |                          |                                |              | DAK DFO in ethanol |                          |                                |              |
|----------------|--------------------------|--------------------------------|--------------|--------------------|--------------------------|--------------------------------|--------------|
| Mode           | Freq [cm <sup>-1</sup> ] | Eps [L/(mol*cm <sup>2</sup> )] | Int [km/mol] | Mode               | Freq [cm <sup>-1</sup> ] | Eps [L/(mol*cm <sup>2</sup> )] | Int [km/mol] |
| 6              | 99.50                    | 0.000015                       | 0.08         | 6                  | 23.13                    | 0.000053                       | 0.27         |
| 7              | 128.16                   | 0.000000                       | 0.00         | 7                  | 36.54                    | 0.000601                       | 3.04         |
| 8              | 149.19                   | 0.000043                       | 0.22         | 8                  | 54.78                    | 0.001139                       | 5.76         |
| 9              | 222.22                   | 0.000028                       | 0.14         | 9                  | 78.21                    | 0.000022                       | 0.11         |
| 10             | 287.74                   | 0.000000                       | 0.00         | 10                 | 104.59                   | 0.000034                       | 0.17         |
| 11             | 292.34                   | 0.000620                       | 3.13         | 11                 | 132.01                   | 0.000225                       | 1.14         |
| 12             | 421.24                   | 0.001308                       | 6.61         | 12                 | 141.16                   | 0.000070                       | 0.36         |
| 13             | 423.75                   | 0.000491                       | 2.48         | 13                 | 153.09                   | 0.000285                       | 1.44         |
| 14             | 444.30                   | 0.000023                       | 0.12         | 14                 | 171.48                   | 0.000101                       | 0.51         |
| 15             | 457.44                   | 0.000000                       | 0.00         | 15                 | 204.65                   | 0.000019                       | 0.10         |
| 16             | 510.43                   | 0.000050                       | 0.25         | 16                 | 214.40                   | 0.000077                       | 0.39         |
| 17             | 571.28                   | 0.000219                       | 1.11         | 17                 | 236.71                   | 0.000144                       | 0.73         |
| 18             | 587.42                   | 0.000000                       | 0.00         | 18                 | 262.43                   | 0.000173                       | 0.87         |
| 19             | 634.42                   | 0.000255                       | 1.29         | 19                 | 286.64                   | 0.001149                       | 5.81         |
| 20             | 701.84                   | 0.002682                       | 13.55        | 20                 | 309.77                   | 0.000372                       | 1.88         |
| 21             | 703.61                   | 0.009091                       | 45.94        | 21                 | 319.80                   | 0.000437                       | 2.21         |
| 22             | 733.09                   | 0.003052                       | 15.42        | 22                 | 339.80                   | 0.000484                       | 2.45         |
| 23             | 792.30                   | 0.000000                       | 0.00         | 23                 | 386.82                   | 0.000356                       | 1.80         |
| 24             | 813.09                   | 0.012149                       | 61.40        | 24                 | 406.62                   | 0.000143                       | 0.72         |
| 25             | 819.10                   | 0.000750                       | 3.79         | 25                 | 428.92                   | 0.000216                       | 1.09         |
| 26             | 859.35                   | 0.000000                       | 0.00         | 26                 | 440.02                   | 0.000340                       | 1.72         |
| 27             | 886.66                   | 0.000743                       | 3.76         | 27                 | 448.08                   | 0.001039                       | 5.25         |
| 28             | 961.19                   | 0.022867                       | 115.56       | 28                 | 481.12                   | 0.000077                       | 0.39         |
| 29             | 971.24                   | 0.000207                       | 1.05         | 29                 | 503.88                   | 0.001894                       | 9.57         |
| 30             | 976.92                   | 0.000000                       | 0.00         | 30                 | 514.28                   | 0.001225                       | 6.19         |
| 31             | 1026.89                  | 0.000185                       | 0.94         | 31                 | 525.52                   | 0.000494                       | 2.50         |
| 32             | 1027.29                  | 0.000000                       | 0.00         | 32                 | 543.67                   | 0.000555                       | 2.80         |
| 33             | 1028.84                  | 0.001797                       | 9.08         | 33                 | 561.10                   | 0.000186                       | 0.94         |
| 34             | 1064.47                  | 0.000003                       | 0.02         | 34                 | 573.31                   | 0.000443                       | 2.24         |
| 35             | 1074.95                  | 0.003641                       | 18.40        | 35                 | 586.69                   | 0.000236                       | 1.19         |
| 36             | 1113.33                  | 0.004464                       | 22.56        | 36                 | 601.28                   | 0.000779                       | 3.94         |
| 37             | 1139.95                  | 0.003551                       | 17.95        | 37                 | 622.26                   | 0.000516                       | 2.61         |
| 38             | 1170.90                  | 0.000185                       | 0.93         | 38                 | 648.43                   | 0.000406                       | 2.05         |
| 39             | 1187.09                  | 0.016707                       | 84.43        | 39                 | 664.64                   | 0.007191                       | 36.34        |
| 40             | 1245.90                  | 0.000518                       | 2.62         | 40                 | 669.61                   | 0.008411                       | 42.51        |
| 41             | 1289.67                  | 0.000015                       | 0.08         | 41                 | 692.68                   | 0.000672                       | 3.39         |
| 42             | 1312.38                  | 0.004214                       | 21.30        | 42                 | 711.53                   | 0.004029                       | 20.36        |
| 43             | 1323.86                  | 0.017336                       | 87.61        | 43                 | 718.18                   | 0.001562                       | 7.89         |
| 44             | 1395.92                  | 0.002552                       | 12.90        | 44                 | 757.03                   | 0.000526                       | 2.66         |
| 45             | 1437.15                  | 0.000130                       | 0.66         | 45                 | 770.70                   | 0.001632                       | 8.25         |

|    |         |          |        |    |         |          |       |
|----|---------|----------|--------|----|---------|----------|-------|
| 46 | 1439.83 | 0.018483 | 93.41  | 46 | 782.12  | 0.002751 | 13.90 |
| 47 | 1501.12 | 0.000034 | 0.17   | 47 | 786.50  | 0.002764 | 13.97 |
| 48 | 1509.40 | 0.001267 | 6.41   | 48 | 823.12  | 0.004308 | 21.77 |
| 49 | 1633.30 | 0.012763 | 64.50  | 49 | 830.00  | 0.003610 | 18.24 |
| 50 | 1638.60 | 0.001203 | 6.08   | 50 | 842.64  | 0.006290 | 31.79 |
| 51 | 1640.52 | 0.013749 | 69.48  | 51 | 854.94  | 0.001081 | 5.46  |
| 52 | 1649.06 | 0.003115 | 15.74  | 52 | 874.48  | 0.001129 | 5.71  |
| 53 | 1832.99 | 0.099222 | 501.43 | 53 | 877.69  | 0.000542 | 2.74  |
| 54 | 3169.35 | 0.006400 | 32.34  | 54 | 901.92  | 0.002014 | 10.18 |
| 55 | 3169.46 | 0.000021 | 0.10   | 55 | 917.54  | 0.002382 | 12.04 |
| 56 | 3194.65 | 0.000880 | 4.44   | 56 | 943.88  | 0.013897 | 70.23 |
| 57 | 3196.54 | 0.000152 | 0.77   | 57 | 958.46  | 0.011767 | 59.47 |
| 58 | 3208.29 | 0.002087 | 10.55  | 58 | 976.95  | 0.000171 | 0.87  |
| 59 | 3208.98 | 0.000401 | 2.03   | 59 | 978.32  | 0.000097 | 0.49  |
|    |         |          |        | 60 | 986.90  | 0.003757 | 18.99 |
|    |         |          |        | 61 | 1003.33 | 0.016333 | 82.54 |
|    |         |          |        | 62 | 1025.63 | 0.002440 | 12.33 |
|    |         |          |        | 63 | 1031.96 | 0.000087 | 0.44  |
|    |         |          |        | 64 | 1032.77 | 0.000045 | 0.23  |
|    |         |          |        | 65 | 1041.15 | 0.001894 | 9.57  |
|    |         |          |        | 66 | 1065.70 | 0.000875 | 4.42  |
|    |         |          |        | 67 | 1069.72 | 0.004357 | 22.02 |
|    |         |          |        | 68 | 1087.09 | 0.003424 | 17.30 |
|    |         |          |        | 69 | 1096.25 | 0.008212 | 41.50 |
|    |         |          |        | 70 | 1115.00 | 0.014280 | 72.17 |
|    |         |          |        | 71 | 1123.46 | 0.002680 | 13.54 |
|    |         |          |        | 72 | 1134.60 | 0.002838 | 14.34 |
|    |         |          |        | 73 | 1155.77 | 0.014865 | 75.12 |
|    |         |          |        | 74 | 1162.65 | 0.008086 | 40.86 |
|    |         |          |        | 75 | 1166.30 | 0.007588 | 38.35 |
|    |         |          |        | 76 | 1178.24 | 0.007435 | 37.57 |
|    |         |          |        | 77 | 1182.04 | 0.012882 | 65.10 |
|    |         |          |        | 78 | 1195.67 | 0.006541 | 33.05 |
|    |         |          |        | 79 | 1198.16 | 0.009871 | 49.89 |
|    |         |          |        | 80 | 1221.87 | 0.003272 | 16.54 |
|    |         |          |        | 81 | 1255.53 | 0.002739 | 13.84 |
|    |         |          |        | 82 | 1284.07 | 0.006611 | 33.41 |
|    |         |          |        | 83 | 1291.40 | 0.008512 | 43.01 |
|    |         |          |        | 84 | 1297.79 | 0.000081 | 0.41  |
|    |         |          |        | 85 | 1308.36 | 0.000604 | 3.05  |
|    |         |          |        | 86 | 1323.50 | 0.004312 | 21.79 |
|    |         |          |        | 87 | 1329.65 | 0.009540 | 48.21 |
|    |         |          |        | 88 | 1334.74 | 0.007856 | 39.70 |
|    |         |          |        | 89 | 1346.50 | 0.005408 | 27.33 |
|    |         |          |        | 90 | 1349.70 | 0.011332 | 57.27 |
|    |         |          |        | 91 | 1353.07 | 0.004037 | 20.40 |
|    |         |          |        | 92 | 1384.81 | 0.000420 | 2.12  |
|    |         |          |        | 93 | 1410.24 | 0.004998 | 25.26 |
|    |         |          |        | 94 | 1434.68 | 0.006466 | 32.68 |
|    |         |          |        | 95 | 1437.76 | 0.008124 | 41.05 |
|    |         |          |        | 96 | 1511.40 | 0.004952 | 25.03 |
|    |         |          |        | 97 | 1512.63 | 0.004500 | 22.74 |
|    |         |          |        | 98 | 1613.67 | 0.000967 | 4.89  |

|  |  |  |  |     |         |          |        |
|--|--|--|--|-----|---------|----------|--------|
|  |  |  |  | 99  | 1615.95 | 0.001915 | 9.68   |
|  |  |  |  | 100 | 1639.25 | 0.011855 | 59.91  |
|  |  |  |  | 101 | 1640.69 | 0.008424 | 42.57  |
|  |  |  |  | 102 | 1655.52 | 0.012757 | 64.47  |
|  |  |  |  | 103 | 1702.45 | 0.009763 | 49.34  |
|  |  |  |  | 104 | 1708.71 | 0.018919 | 95.61  |
|  |  |  |  | 105 | 1750.54 | 0.016363 | 82.69  |
|  |  |  |  | 106 | 1821.76 | 0.076299 | 385.58 |
|  |  |  |  | 107 | 1824.67 | 0.133375 | 674.02 |
|  |  |  |  | 108 | 2984.82 | 0.000353 | 1.79   |
|  |  |  |  | 109 | 2999.60 | 0.004080 | 20.62  |
|  |  |  |  | 110 | 3067.91 | 0.004364 | 22.05  |
|  |  |  |  | 111 | 3102.72 | 0.006542 | 33.06  |
|  |  |  |  | 112 | 3164.83 | 0.003649 | 18.44  |
|  |  |  |  | 113 | 3166.02 | 0.003673 | 18.56  |
|  |  |  |  | 114 | 3170.45 | 0.000952 | 4.81   |
|  |  |  |  | 115 | 3182.44 | 0.001405 | 7.10   |
|  |  |  |  | 116 | 3195.01 | 0.000323 | 1.63   |
|  |  |  |  | 117 | 3195.06 | 0.000319 | 1.61   |
|  |  |  |  | 118 | 3209.16 | 0.001206 | 6.10   |
|  |  |  |  | 119 | 3209.24 | 0.001104 | 5.58   |

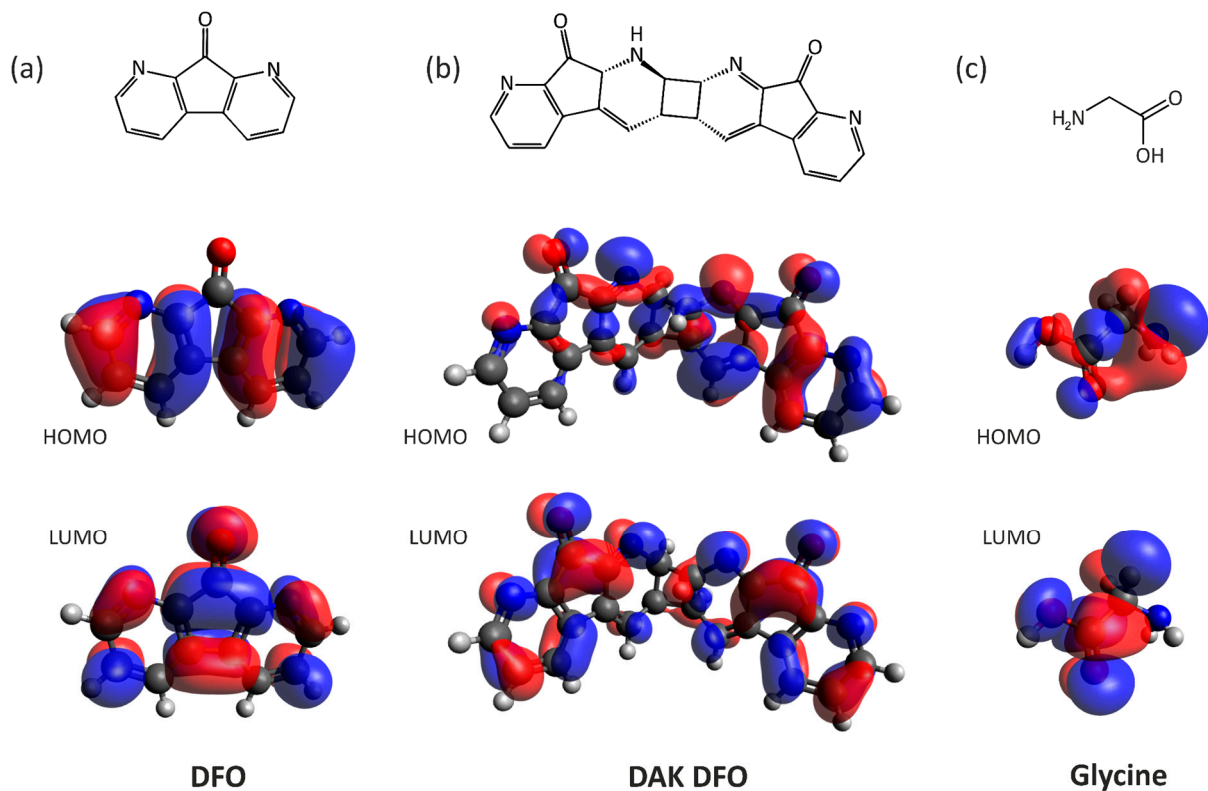

**Figure S1.** Chemical structures and the visualization of their HOMO-LUMO orbitals of DFO (a), DAK DFO (b), and glycine (c).

**Video 1** - Reaction path for DAK DFO
